# Supplementary material for: Towards a Rational Design of Zeolite-Polymer Composite Nanofibers for Efficient Adsorption of Creatinine
Source: Hindawi journal article supplement (doi:10.1155/2016/5638905), 2016-01-01
Supplement: f1 [file 5638905.f1.docx]

**Supporting information**

**Towards a Rational Design of Zeolite-polymer Composite Nanofibers for Efficient Adsorption of Creatinine**

Ryo Takai1,2, Rio Kurimoto1,2, Yasuhiro Nakagawa1,2, Yohei Kotsuchibashi1,

Koki Namekawa1, Mitsuhiro Ebara1,2,3*

1International Center for Materials Nanoarchitectonics (WPI-MANA), National Institute for Materials Science (NIMS)

2Graduate School of Pure and Applied Science, University of Tsukuba

3Graduate School of Industrial and Technology, Tokyo University of Science

* Corresponding author.

Tel: +81-29-860-4775

Fax: +81-29-860-4714

E-mail: [EBARA.Mitsuhiro@nims.go.jp](mailto:EBARA.Mitsuhiro@nims.go.jp)

Contents:

Thermogravimetry curves for zeolite/EVOH nanofiber composites (Figure S1)

Creatinine adsorption capacity for various zeolites (Figure S2)

Creatinine adsorption capacity of bare zeolite and zeolite/EVOH nanofiber mesh as a role of solution temperature (Figure S3)

 
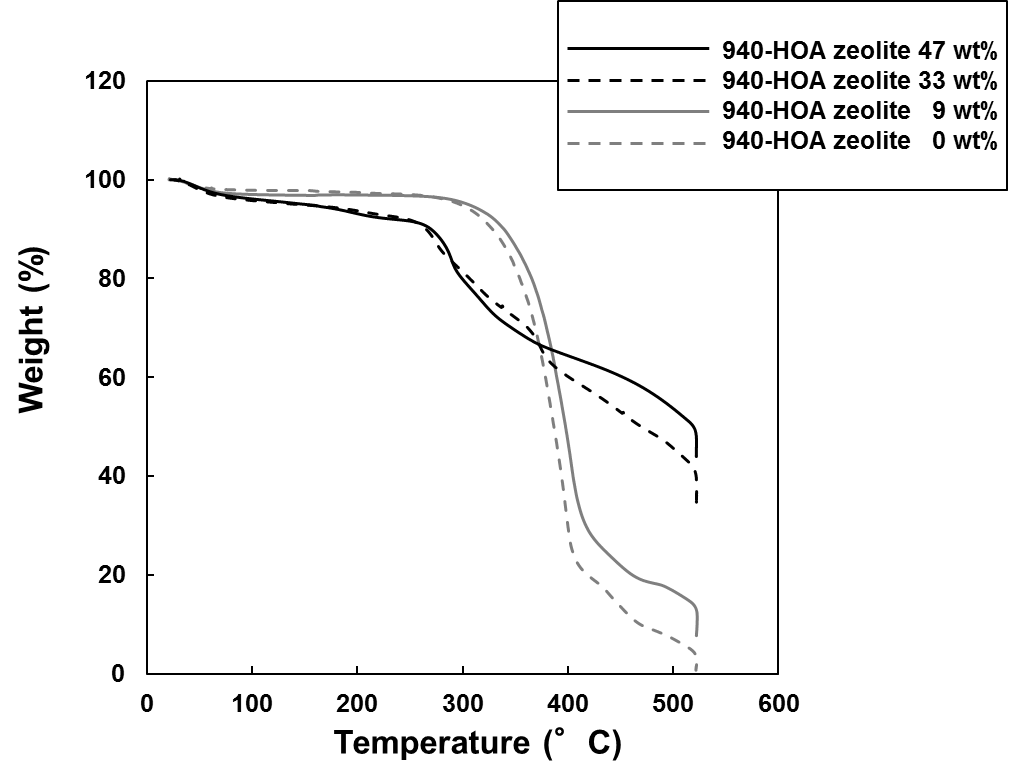


Figure S1. Thermogravimetry curves for zeolite/EVOH nanofiber composites. The weight percentages of zeolites in nanofibers were calculated from the weight loss of nanofiber composites by thermogravimetric analysis (TGA, SII Nanotechnology, Japan).


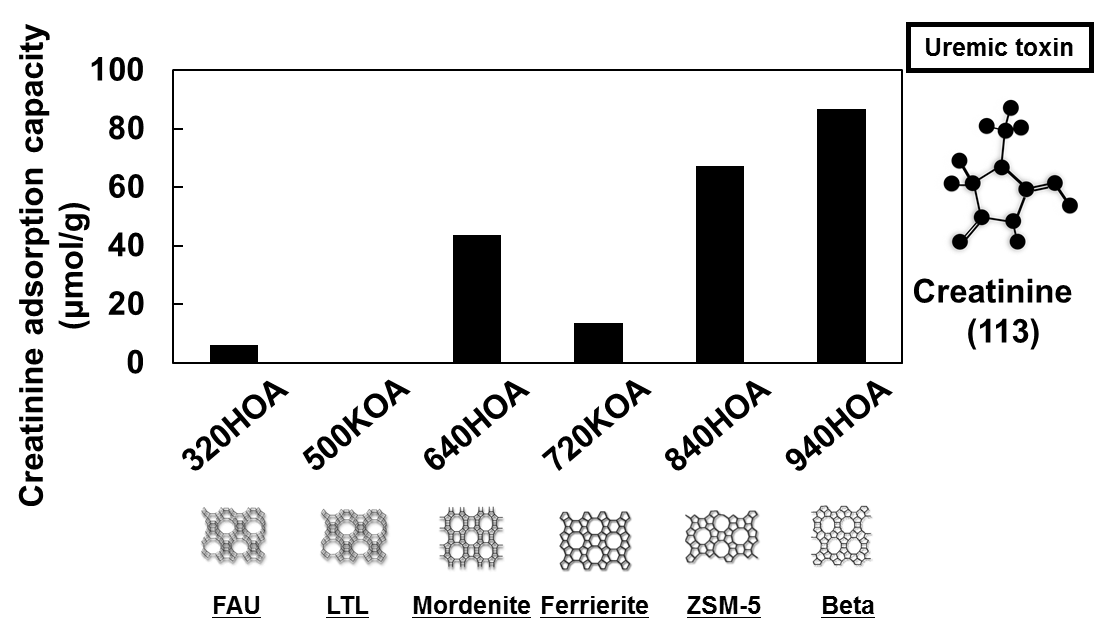


Figure S2 Creatinine adsorption capacity for various zeolites after 12 h of immersion at 37 °C (n=1).


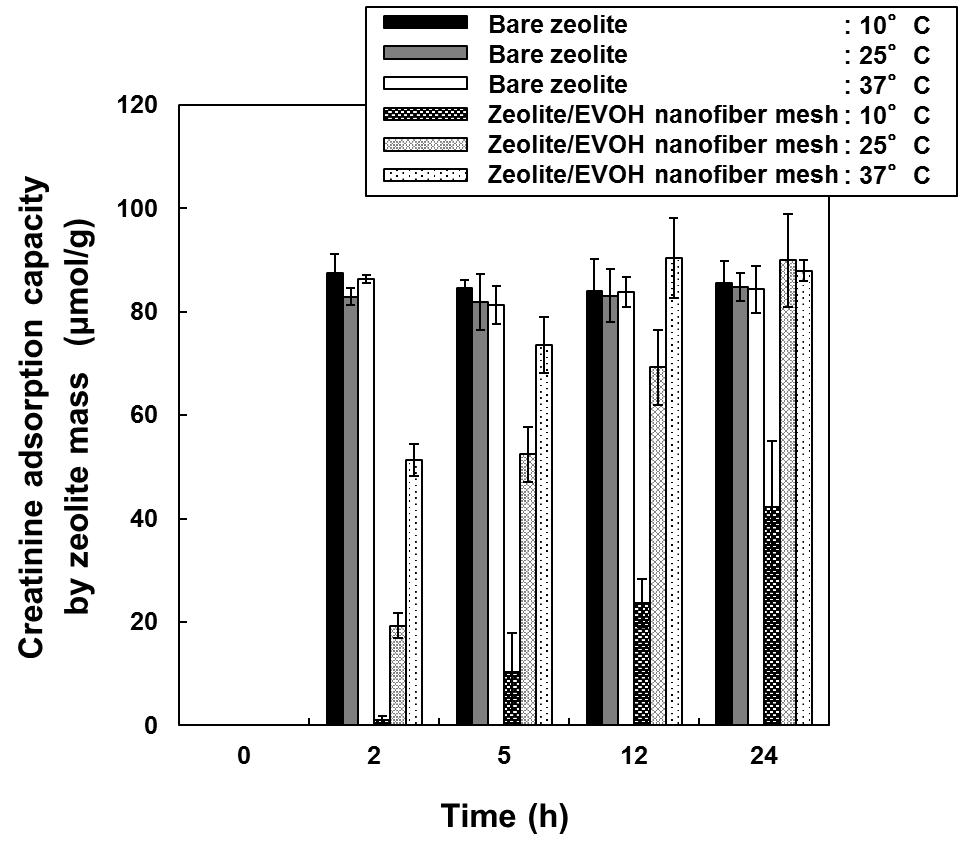


Figure S3. Creatinine adsorption capacities of bare zeolite and zeolite/EVOH nanofiber mesh as a role of solution temperature (10°C, 25°C, 37°C). Immersion time were from 0 to 24 h (n=3).
